# Supplementary material
Source: publisher site journal article supplement (https://www.dovepress.com/article/530434)
Supplement: Supplementary file 1 [file Supplementary%20materials_1.docx]

*Supplementary materials for*

**Efficacy and safety of different sequences for mFOLFIRINOX (or SOXIRI) and Gemcitabine plus albumin-bound paclitaxel in unresectable pancreatic cancer**

**Running title: Sequential** **regimens of inoperable pancreatic cancer**

**Silan Huang1 †, Lingli Huang1 †, Dongsheng Zhang2, Qi Jiang1,** **Fenghua Wang2*, Guifang Guo1*******

1 VIP Department, State Key Laboratory of Oncology in South China, Collaborative Innovation Center for Cancer Medicine, Guangdong Provincial Clinical Research Center for Cancer, Sun Yat-sen University Cancer Center, Guangzhou, Guangdong, People’s Republic of China;

2 Department of Medical Oncology, State Key Laboratory of Oncology in South China, Collaborative Innovation Center for Cancer Medicine, Guangdong Provincial Clinical Research Center for Cancer, Sun Yat-sen University Cancer Center, Guangzhou, Guangdong, People’s Republic of China;

*** Correspondence:**Corresponding Author: Guifang Guo, Address: VIP Department, State Key Laboratory of Oncology in South China, Collaborative Innovation Center for Cancer Medicine, Guangdong Provincial Clinical Research Center for Cancer, Sun Yat-sen University Cancer Center, Guangzhou, Guangdong, People’s Republic of China; Email: [guogf@sysucc.org.cn](mailto:guogf@sysucc.org.cn);

* Co-corresponding author: Fenghua Wang, Address: Department of Medical Oncology, State Key Laboratory of Oncology in South China, Collaborative Innovation Center for Cancer Medicine, Guangdong Provincial Clinical Research Center for Cancer, Sun Yat-sen University Cancer Center, Guangzhou, Guangdong, People’s Republic of China; Email: wangfh[@sysucc.org.cn](mailto:guogf@sysucc.org.cn).

† The first authors contributed equally to this manuscript.

**Supplementary Methods**

**Data Collection**

Patient demographics and baseline characteristics included age, sex, ECOG score, clinical stage, pathological grade, metastatic site, tumor site, biliary drainage, hepatitis B, diabetes, height, weight, albumin, bilirubin (TBIL, direct bilirubin and indirect bilirubin), aminotransferase (aspartate aminotransferase and alanine aminotransferase), serum creatinine, and tumor markers [carbohydrate antigen (CA)19-9, CA12-5, CA24-2, CA72-4 and carcinoembryonic antigen (CEA)]. The differentiation grade of cancers is closely linked to patient prognosis. Highly differentiated adenocarcinomas generally have a better prognosis, while moderately and poorly differentiated adenocarcinomas have a poorer prognosis and similar biological behavior. Thus, this study combined the analysis of moderately and poorly differentiated adenocarcinomas. Height and weight were further analyzed by calculating body mass index, which was classified into low weight, normal weight and overweight based on the normal range of 18.5-25.0 kg/m2.

**Study Design and Population**

The inclusion criteria: 1) age≥18 years, 2) at least one cycle of both AG and FFXm or SOXIRI therapies, 3) histologically confirmed pancreatic adenocarcinoma, 4) measurable pancreatic adenocarcinoma and/or metastatic lesions not previously been treated with chemotherapy in the UPDA setting or if neoadjuvant/adjuvant chemotherapy was accepted more than six months ago, 5) Eastern Cooperative Oncology Group (ECOG) performance status score of 0 or 1, 5) adequate bone marrow , liver and renal functions (granulocyte count ≥1500 per cubic millimeter, platelet count ≥100,000 per cubic millimeter; and bilirubin level ≤1.5 times the upper limit of the normal range or ≤5 times that value after cholangial drainage; and creatinine clearance measured value or estimated value based on the Cockcroft-Gault equation ≥60 mL/min).

**Supplementary Figures**

**
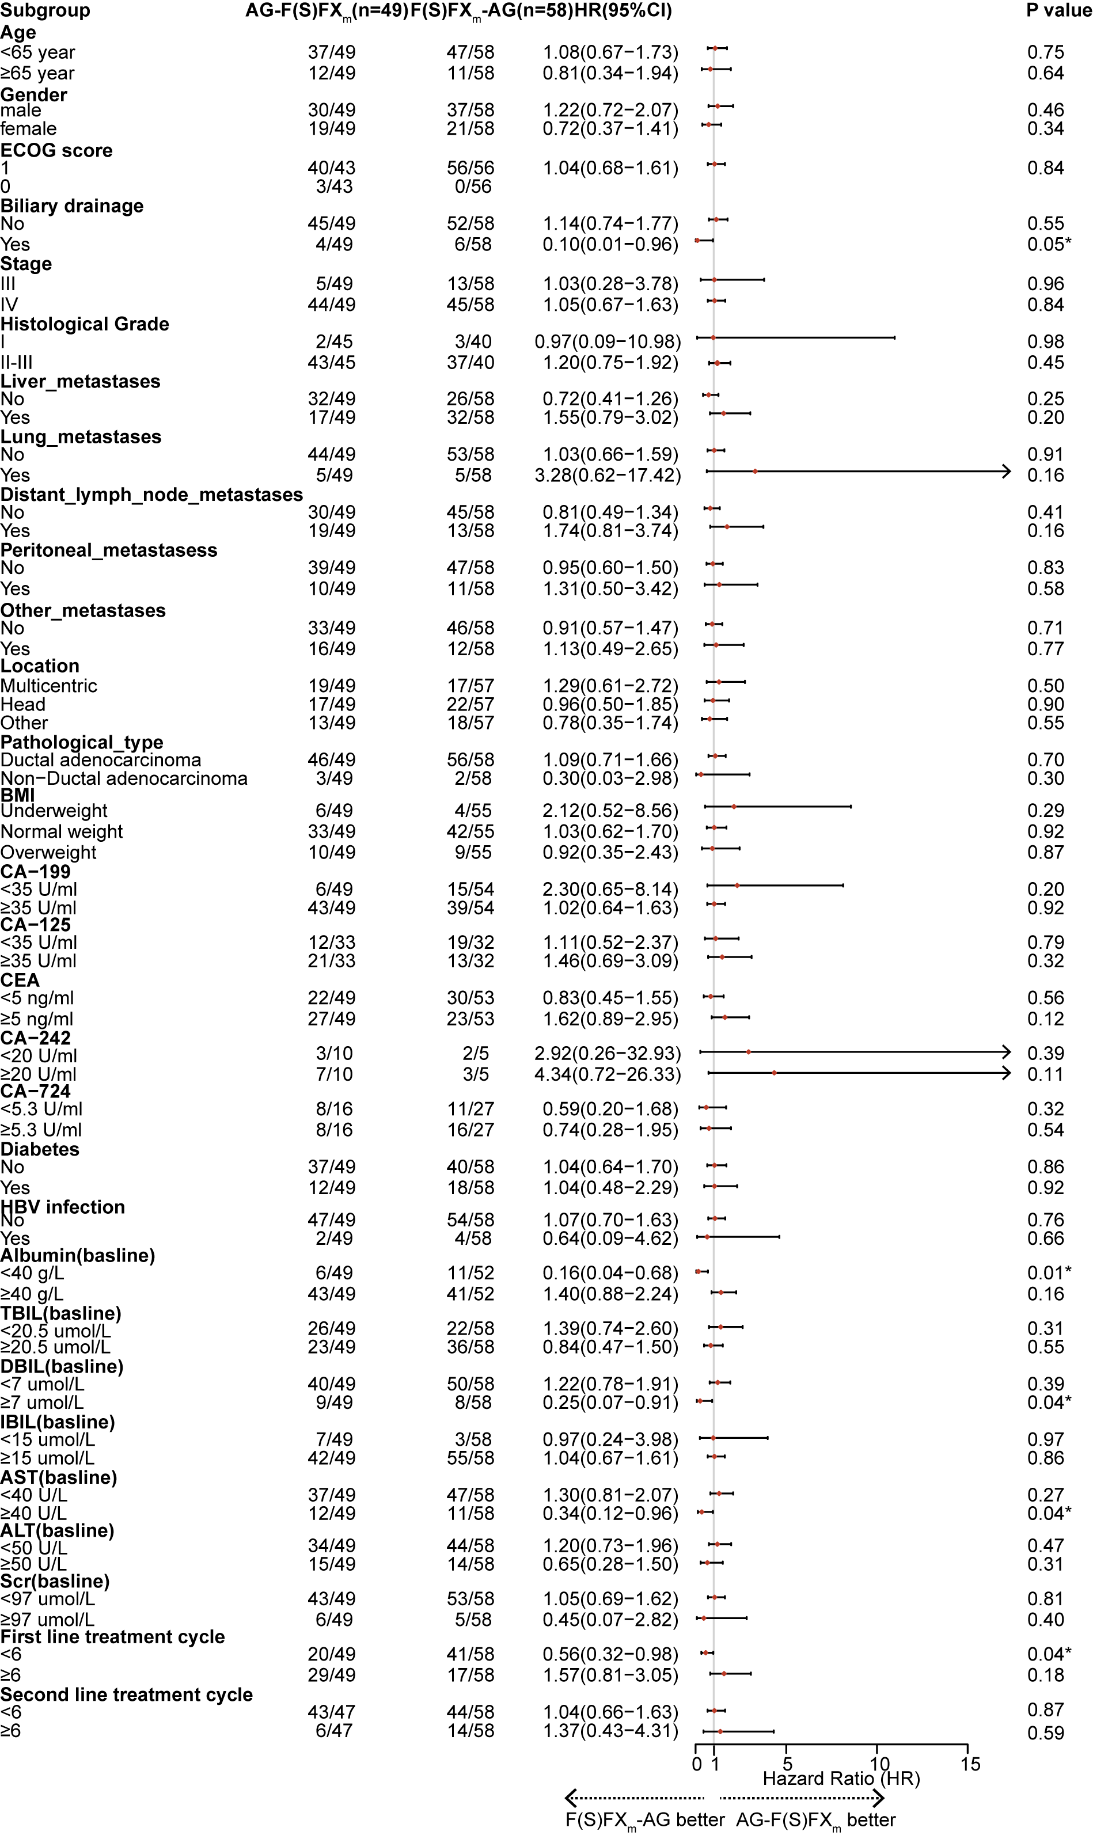
**

**Fig. S1** Subgroup analysis for overall survival of F(S)FXm-AG versus AG-F(S)FXm. * significantly different.


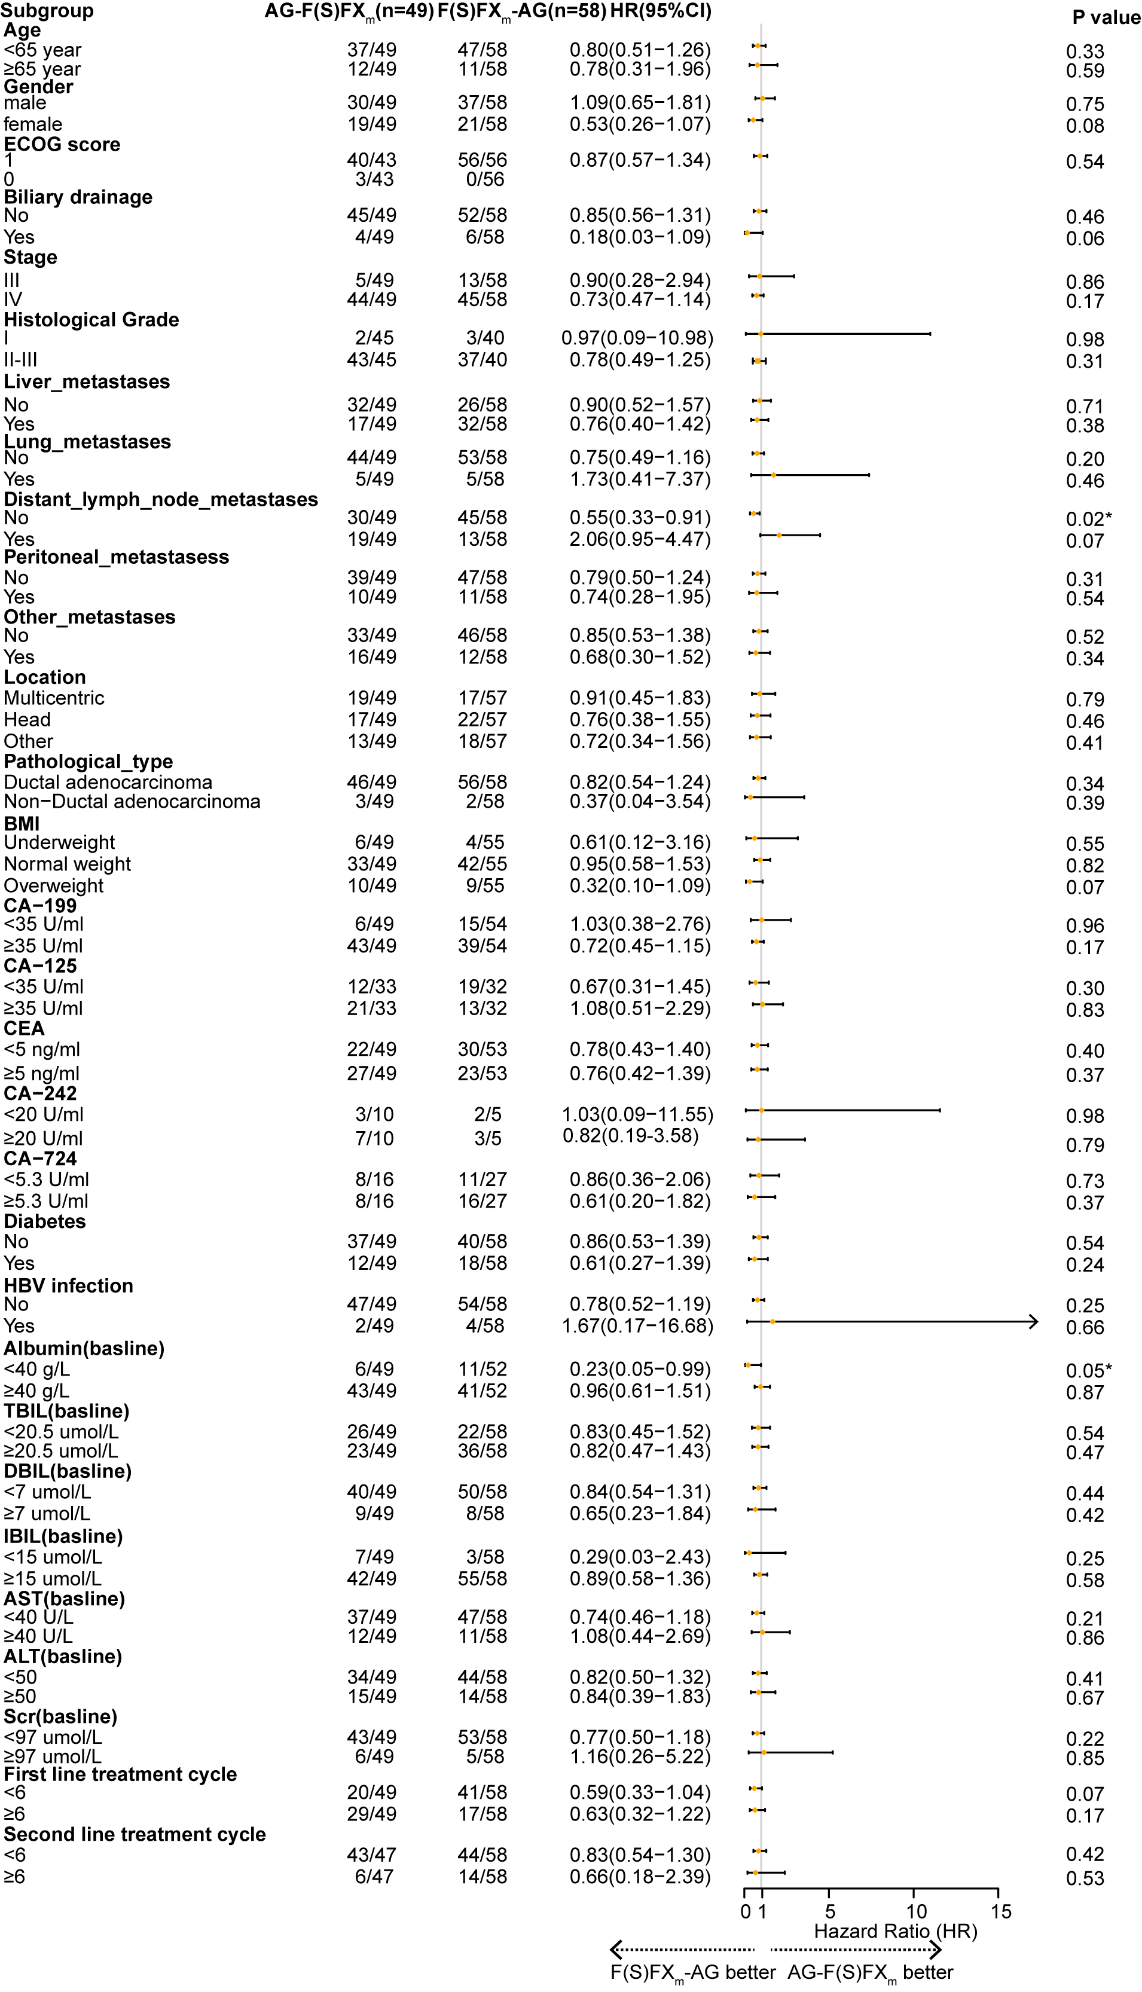


**Fig. S2** Subgroup analysis for progression free survival of first-line treatment of F(S)FXm-AG versus AG-F(S)FXm. * significantly different.


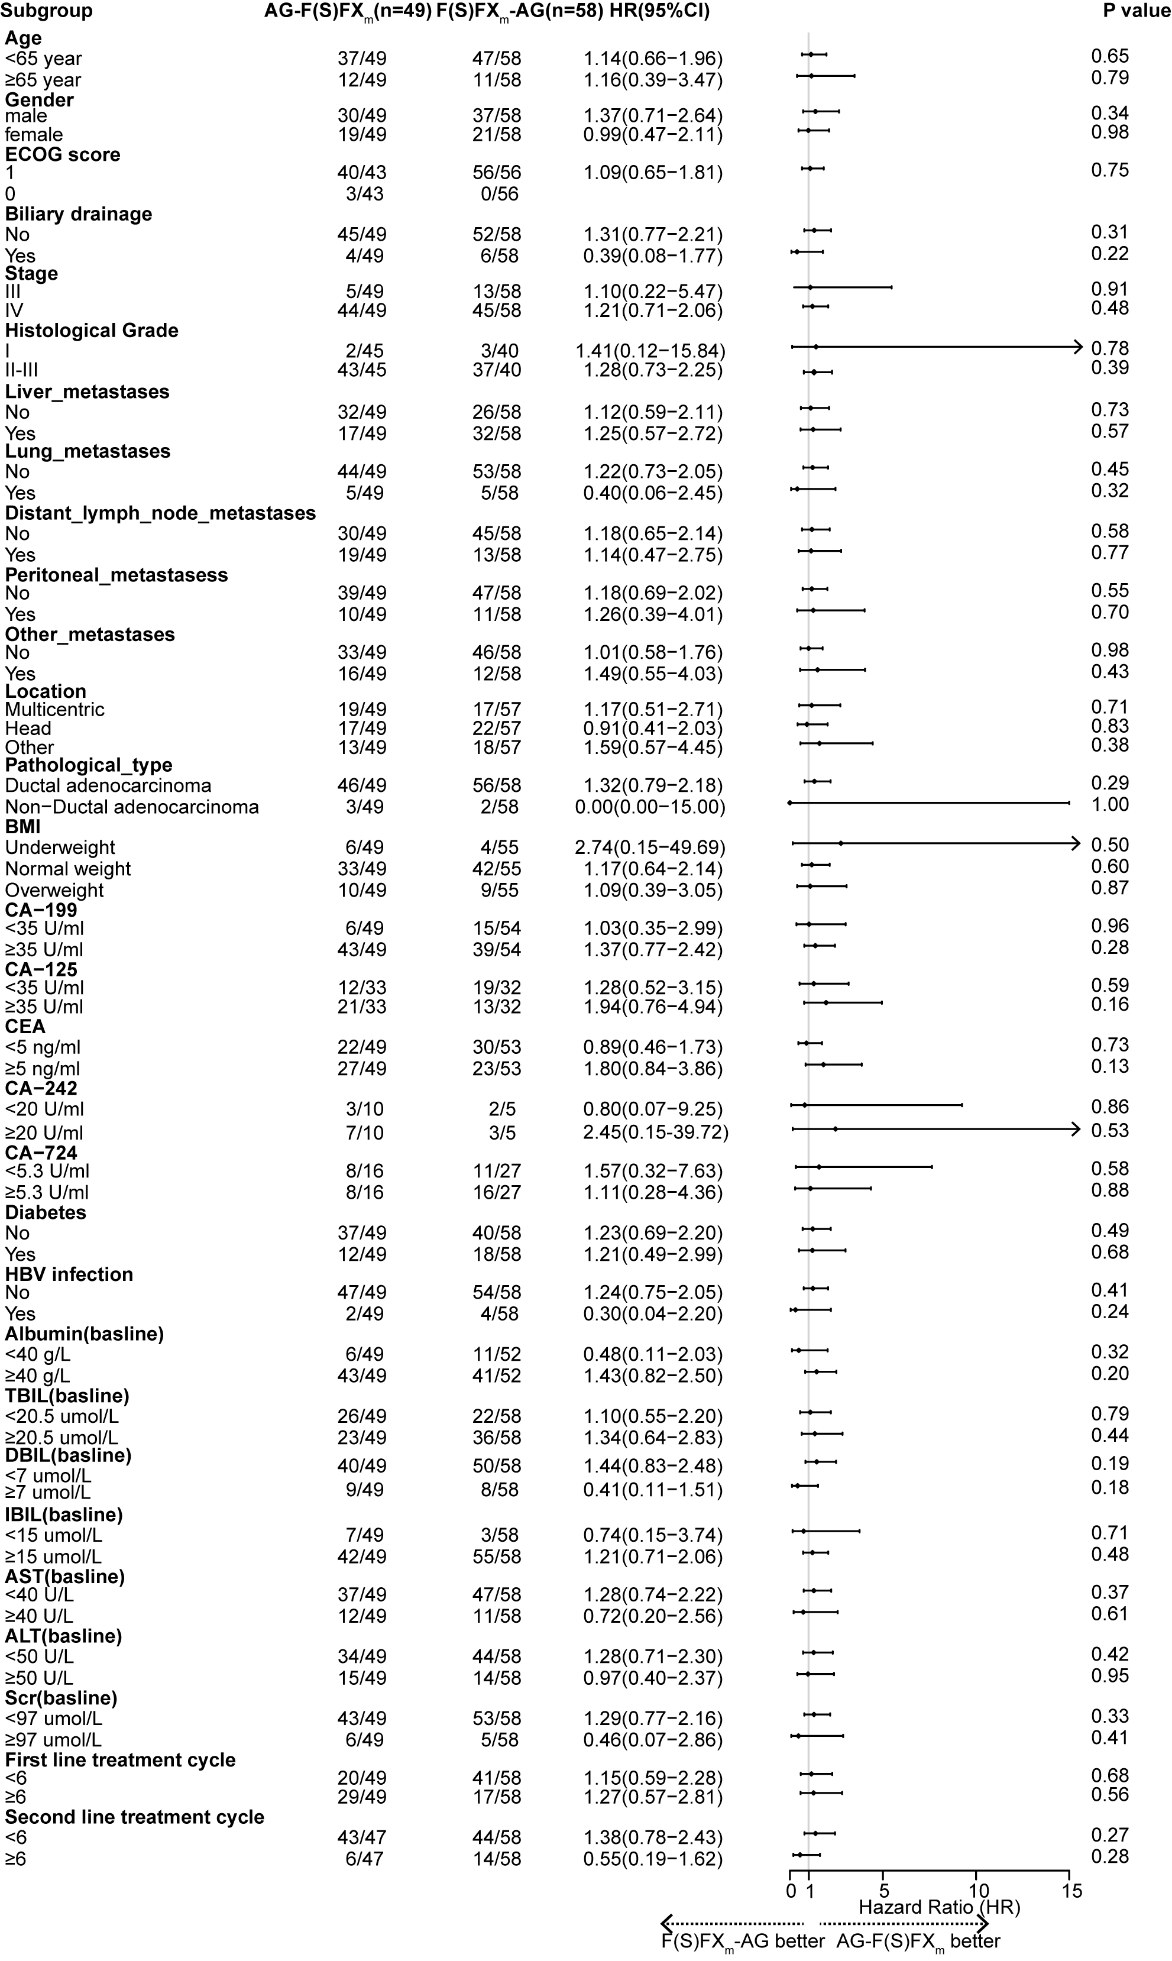


**Fig. S3** Subgroup analysis for progression free survival of second-line treatment of F(S)FXm-AG versus AG-F(S)FXm. * significantly different.


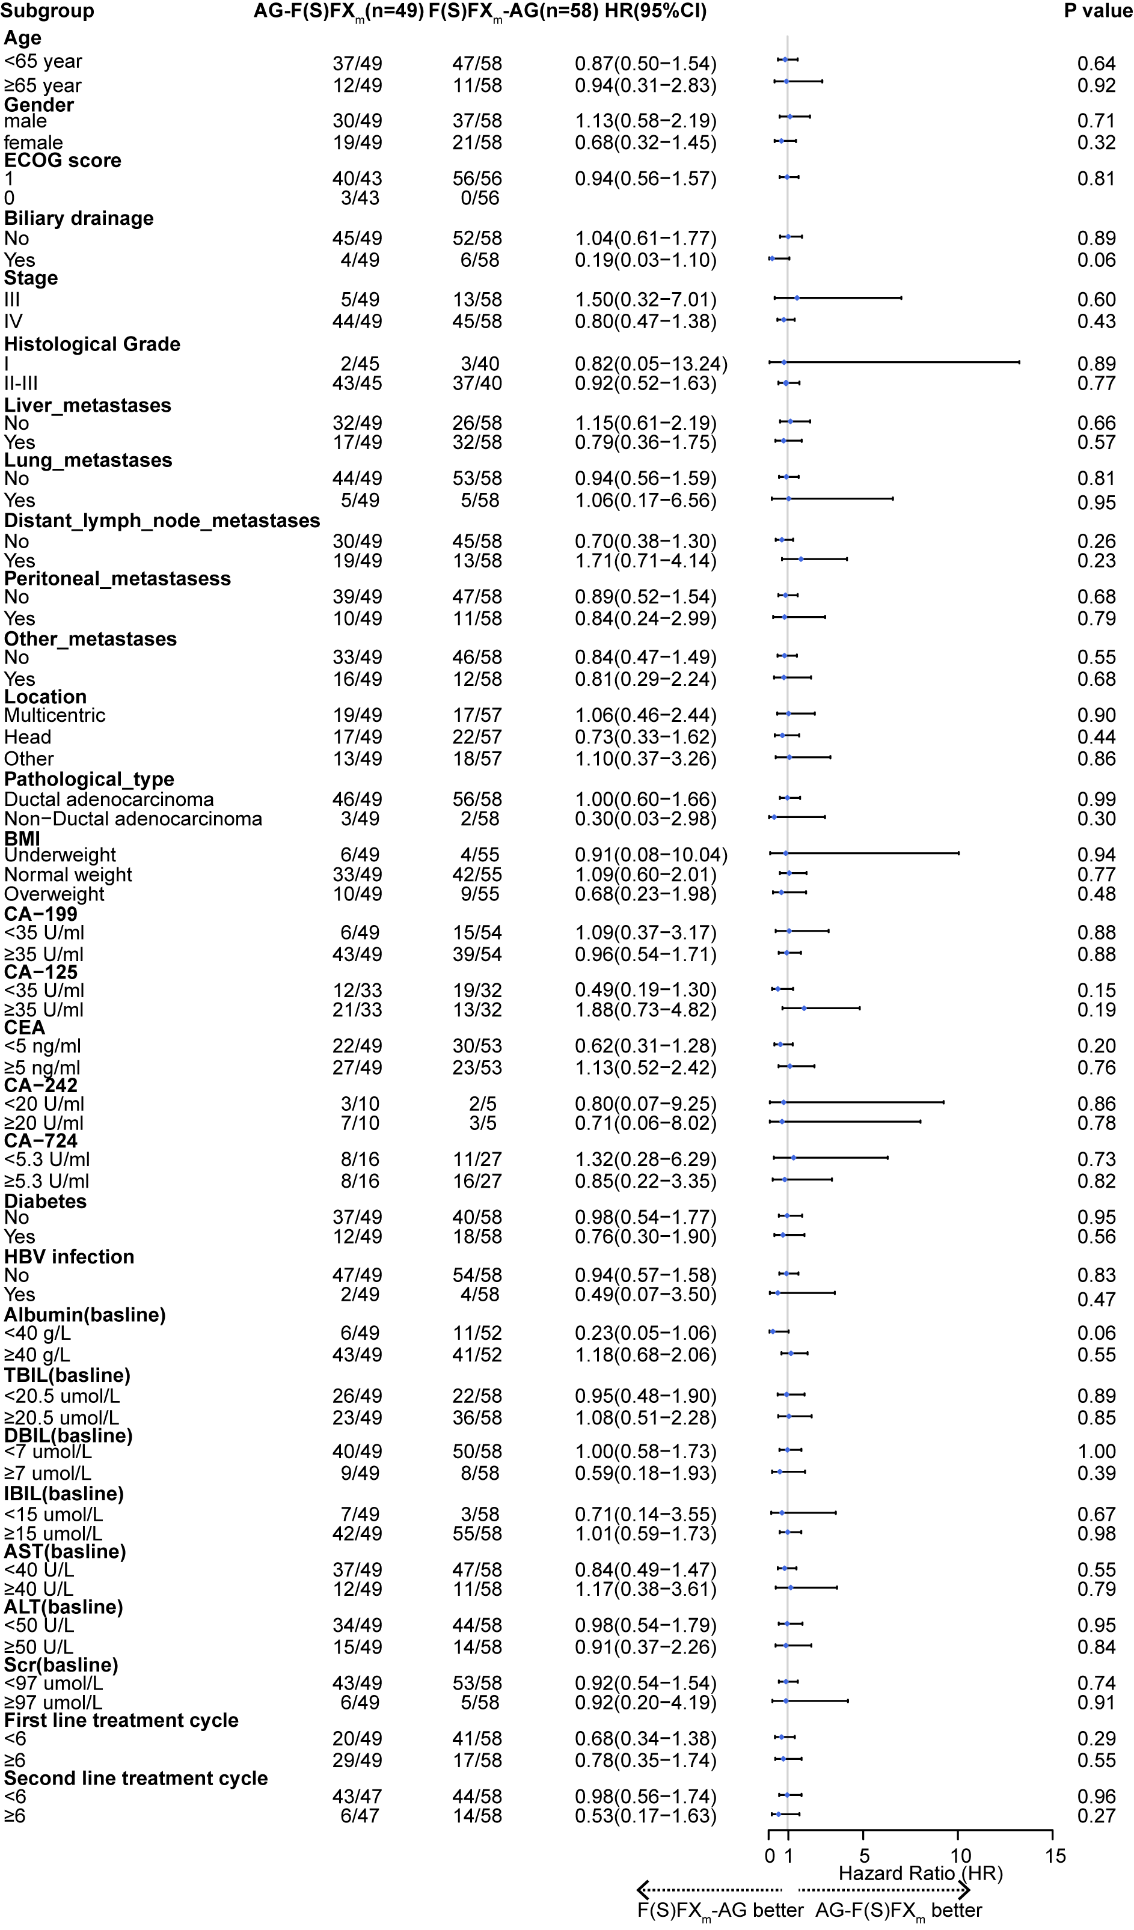


**Fig. S4** Subgroup analysis for total progression free survival of F(S)FXm-AG versus AG-F(S)FXm. * significantly different.

**
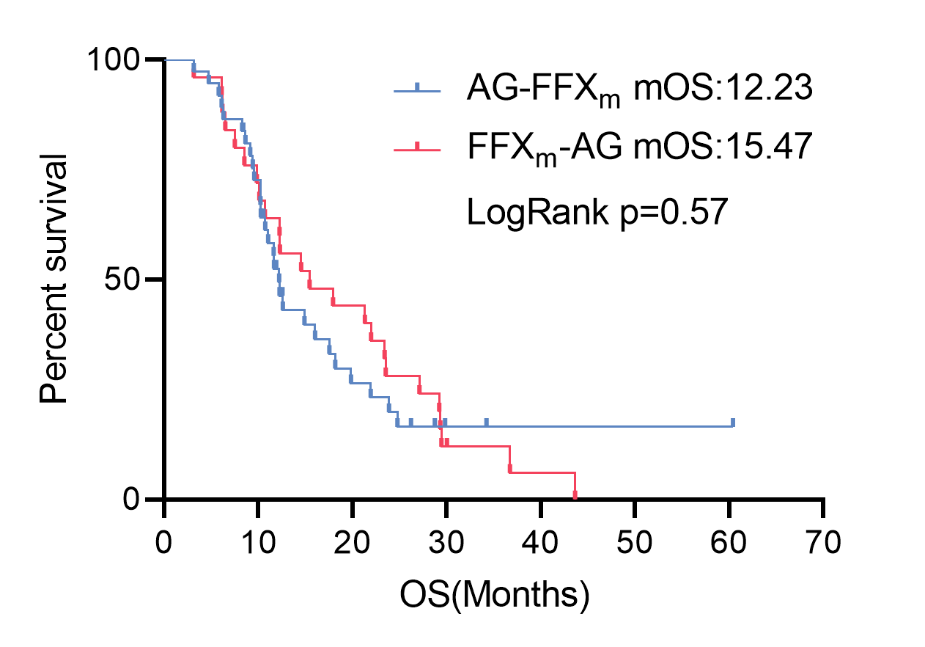
**

**Fig. S5** The overall survival between FFXm-AG and AG-FFXm. AG-FFXm, AG (albumin-bound-paclitaxel plus gemcitabine) followed by mFOLFIRINOX (fluorouracil, leucovorin, irinotecan, oxaliplatin); FFXm-AG, mFOLFIRINOX followed by AG; OS, overall survival.

**Supplementary tables**

Table S1 Univariate and multivariate COX regression for overall survival in the whole population

| Overall survival | Univariate COX | |  | Multivariate COX | |
| --- | --- | --- | --- | --- | --- |
| HR (95% CI) | P-value |  | HR (95% CI) | P-value |
| Age (years) ( ≥65; reference:＜65) | 0.87(0.53-1.42) | 0.571 |  |  |  |
| ECOG PS score (1; reference: 0) | 1.19(0.37-3.81) | 0.764 |  |  |  |
| First-line treatment cycle ( ≥6; reference:＜6 ) | 0.54(0.36-0.81) | 0.003* |  | 0.48(0.31-0.73) | 0.001* |
| Second-line treatment cycle ( ≥6; reference:＜6 ) | 0.45(0.28-0.72) | 0.001* |  | 0.41(0.25-0.68) | 0.001* |
| BMI (kg/m2) (Normal weight; Overweight; reference: Underweight) | 0.85(0.57-1.28) | 0.442 |  |  |  |
| Gender (Female; reference: Male) | 1.07(0.71-1.64) | 0.737 |  |  |  |
| Biliary drainage (Yes; reference: No) | 1.23(0.64-2.38) | 0.537 |  |  |  |
| Histological Grade (II; III; reference: I) | 1.26(0.85-1.86) | 0.251 |  |  |  |
| Stage (IV; reference: III) | 0.95(0.74-1.23) | 0.715 |  |  |  |
| Location (Other; Multicentric; reference: Head) | 1.35(0.78-2.35) | 0.288 |  |  |  |
| Liver metastases (Yes; reference: No) | 1.05(0.7-1.58) | 0.812 |  |  |  |
| Lung metastases (Yes; reference: No) | 1.19(0.61-2.32) | 0.601 |  |  |  |
| Lymph node metastasis (Yes; reference: No) | 1.18(0.75-1.85) | 0.475 |  |  |  |
| Peritoneal metastasis (Yes; reference: No) | 1.55(0.92-2.6) | 0.100 |  |  |  |
| Other metastases (Yes; reference: No) | 0.78(0.48-1.25) | 0.300 |  |  |  |
| pathological | 0.75(0.3-1.86) | 0.532 |  |  |  |
| Diabetes (Yes; reference: No) | 0.68(0.43-1.08) | 0.099 |  |  |  |
| Hepatitis B infection (Yes; reference: No) | 1.04(0.45-2.38) | 0.929 |  |  |  |
| CA19-9 (U/mL) (≥35; reference:＜35) | 2.04(1.18-3.54) | 0.011* |  | 2.49(1.40-4.42) | 0.002* |
| CA12-5 (U/mL) (≥35; reference:＜35) | 1.15(0.68-1.93) | 0.607 |  |  |  |
| CA24-2 (U/mL) (≥20; reference:＜20) | 2.55(0.63-10.3) | 0.188 |  |  |  |
| CA72-4 (U/mL) (≥5.3; reference:＜5.3) | 1.15(0.61-2.18) | 0.666 |  |  |  |
| CEA (ng/mL) (≥5; reference:＜5) | 1.28(0.85-1.95) | 0.242 |  |  |  |
| Scr (umol/L) (≥97; reference:＜97) | 0.48(0.23-1) | 0.051* |  | 0.38(0.13-1.16) | 0.091 |
| TBIL (umol/L) (≥20.5; reference:＜20.5) | 1.08(0.72-1.63) | 0.713 |  |  |  |
| DBIL (umol/L) (≥7; reference:＜7) | 0.83(0.47-1.44) | 0.501 |  |  |  |
| IBIL (umol/L) (≥15; reference:＜15) | 1.16(0.58-2.31) | 0.672 |  |  |  |
| AST (U/L) (≥40; reference:＜40) | 0.9(0.55-1.47) | 0.665 |  |  |  |
| ALT (U/L) (≥50; reference:＜50) | 0.99(0.63-1.55) | 0.951 |  |  |  |
| Albumin (g/L) (≥40; reference:＜40) | 1.00(0.59-1.7) | 0.994 |  |  |  |

*: significantly different

Table S2 Univariate and multivariate COX regression for progression free survival of first-line treatment in the whole population

| Progression free survival-1 | Univariate COX | | | |  | | Multivariate COX | | | |
| --- | --- | --- | --- | --- | --- | --- | --- | --- | --- | --- |
| HR (95% CI) | | P-value | |  | | HR (95% CI) | | P-value | |
| Age (years) ( ≥65; reference:＜65) | 0.72(0.44-1.19) | | 0.202 | |  | |  | |  | |
| ECOG PS score (1; reference: 0) | | 0.43(0.1-1.77) | | 0.243 | |  | |  | |  | |
| First-line treatment cycle ( ≥6; reference:＜6) | 0.15(0.09-0.24) | | 0.000* | |  | | 0.15(0.09-0.24) | | 0.000* | |
| Second-line treatment cycle ( ≥6; reference:＜6) | 1.02(0.65-1.6) | | 0.941 | |  | |  | |  | |
| BMI (kg/m2) (Normal weight; Overweight; reference: Underweight) | 0.99(0.65-1.51) | | 0.969 | |  | |  | |  | |
| Gender (Female; reference: Male) | 1.08(0.72-1.63) | | 0.713 | |  | |  | |  | |
| Biliary drainage (Yes; reference: No) | 1.26(0.63-2.53) | | 0.513 | |  | |  | |  | |
| Histological Grade (II; III; reference: I) | 0.88(0.59-1.31) | | 0.533 | |  | |  | |  | |
| Stage (IV; reference: III) | 0.8(0.46-1.4) | | 0.437 | |  | |  | |  | |
| Location (Other; Multicentric; reference: Head) | 0.97(0.76-1.25) | | 0.83 | |  | |  | |  | |
| Liver metastases (Yes; reference: No) | 0.83(0.56-1.25) | | 0.372 | |  | |  | |  | |
| Lung metastases (Yes; reference: No) | 0.6(0.31-1.16) | | 0.131 | |  | |  | |  | |
| Lymph node metastasis (Yes; reference: No) | 1.04(0.67-1.61) | | 0.861 | |  | |  | |  | |
| Peritoneal metastasis (Yes; reference: No) | 1.36(0.82-2.23) | | 0.231 | |  | |  | |  | |
| Other metastases (Yes; reference: No) | 0.85(0.54-1.34) | | 0.484 | |  | |  | |  | |
| pathological | 1.68(0.67-4.23) | | 0.269 | |  | |  | |  | |
| Diabetes (Yes; reference: No) | 0.96(0.61-1.49) | | 0.840 | |  | |  | |  | |
| Hepatitis B infection (Yes; reference: No) | 0.92(0.37-2.28) | | 0.863 | |  | |  | |  | |
| CA19-9 (U/mL) (≥35; reference:＜35) | 1.19(0.71-1.98) | | 0.514 | |  | |  | |  | |
| CA12-5 (U/mL) (≥35; reference:＜35) | 1.39(0.83-2.33) | | 0.217 | |  | |  | |  | |
| CA24-2 (U/mL) (≥20; reference:＜20) | 2.06(0.55-7.78) | | 0.285 | |  | |  | |  | |
| CA72-4 (U/mL) (≥5.3; reference:＜5.3) | 0.79(0.42-1.49) | | 0.469 | |  | |  | |  | |
| CEA (ng/mL) (≥5; reference:＜5) | 0.94(0.62-1.4) | | 0.748 | |  | |  | |  | |
| Scr (umol/L) (≥97; reference:＜97) | 1.04(0.52-2.08) | | 0.907 | |  | |  | |  | |
| TBIL (umol/L) (≥20.5; reference:＜20.5) | 0.81(0.54-1.21) | | 0.298 | |  | |  | |  | |
| DBIL (umol/L) (≥7; reference:＜7) | 0.96(0.56-1.65) | | 0.897 | |  | |  | |  | |
| IBIL (umol/L) (≥15; reference:＜15) | 0.96(0.48-1.9) | | 0.898 | |  | |  | |  | |
| AST (U/L) (≥40; reference:＜40) | 1.2(0.74-1.95) | | 0.460 | |  | |  | |  | |
| ALT (U/L) (≥50; reference:＜50) | 1.44(0.92-2.27) | | 0.109 | |  | |  | |  | |
| Albumin (g/L) (≥40; reference:＜40) | 1.16(0.68-2.00) | | 0.586 | |  | |  | |  | |

*: significantly different

Table S3 Univariate and multivariate COX regression for progression free survival of second-line treatment in the whole population

| Progression free survival-2 | Univariate COX | | | |  | | Multivariate COX | | | |
| --- | --- | --- | --- | --- | --- | --- | --- | --- | --- | --- |
| HR (95% CI) | | P-value | |  | | HR (95% CI) | | P-value | |
| Age (years) ( ≥65; reference:＜65) | 0.96(0.52-1.76) | | 0.886 | |  | |  | |  | |
| ECOG PS score (1; reference: 0) | | 0.94(0.29-3.02) | | 0.923 | |  | |  | |  | |
| First-line treatment cycle ( ≥6; reference:＜6) | 1.21(0.74-1.97) | | 0.439 | |  | |  | |  | |
| Second-line treatment cycle ( ≥6; reference:＜6) | 0.6(0.36-0.99) | | 0.045* | |  | | 0.6(0.36-0.99) | | 0.045* | |
| BMI (kg/m2) (Normal weight; Overweight; reference: Underweight) | 1.21(0.75-1.96) | | 0.436 | |  | |  | |  | |
| Gender (Female; reference: Male) | 1.33(0.82-2.17) | | 0.252 | |  | |  | |  | |
| Biliary drainage (Yes; reference: No) | 1.38(0.68-2.79) | | 0.369 | |  | |  | |  | |
| Histological Grade (II; III; reference: I) | 0.94(0.59-1.51) | | 0.806 | |  | |  | |  | |
| Stage (IV; reference: III) | 1.14(0.61-2.13) | | 0.686 | |  | |  | |  | |
| Location (Other; Multicentric; reference: Head) | 1.15(0.86-1.55) | | 0.35 | |  | |  | |  | |
| Liver metastases (Yes; reference: No) | 0.97(0.6-1.58) | | 0.903 | |  | |  | |  | |
| Lung metastases (Yes; reference: No) | 1.05(0.45-2.45) | | 0.906 | |  | |  | |  | |
| Lymph node metastasis (Yes; reference: No) | 1.36(0.8-2.31) | | 0.252 | |  | |  | |  | |
| Peritoneal metastasis (Yes; reference: No) | 1.24(0.66-2.32) | | 0.505 | |  | |  | |  | |
| Other metastases (Yes; reference: No) | 0.73(0.41-1.28) | | 0.268 | |  | |  | |  | |
| pathological | 0.5(0.18-1.39) | | 0.185 | |  | |  | |  | |
| Diabetes (Yes; reference: No) | 0.73(0.43-1.24) | | 0.241 | |  | |  | |  | |
| Hepatitis B infection (Yes; reference: No) | 1.44(0.57-3.61) | | 0.438 | |  | |  | |  | |
| CA19-9 (U/mL) (≥35; reference:＜35) | 1.26(0.71-2.23) | | 0.426 | |  | |  | |  | |
| CA12-5 (U/mL) (≥35; reference:＜35) | 1(0.53-1.9) | | 0.997 | |  | |  | |  | |
| CA24-2 (U/mL) (≥20; reference:＜20) | 0.84(0.18-3.83) | | 0.819 | |  | |  | |  | |
| CA72-4 (U/mL) (≥5.3; reference:＜5.3) | 1.05(0.45-2.43) | | 0.918 | |  | |  | |  | |
| CEA (ng/mL) (≥5; reference:＜5) | 0.78(0.48-1.29) | | 0.34 | |  | |  | |  | |
| Scr (umol/L) (≥97; reference:＜97) | 0.74(0.34-1.62) | | 0.449 | |  | |  | |  | |
| TBIL (umol/L) (≥20.5; reference:＜20.5) | 0.9(0.56-1.46) | | 0.673 | |  | |  | |  | |
| DBIL (umol/L) (≥7; reference:＜7) | 1.27(0.69-2.34) | | 0.439 | |  | |  | |  | |
| IBIL (umol/L) (≥15; reference:＜15) | 0.76(0.37-1.55) | | 0.445 | |  | |  | |  | |
| AST (U/L) (≥40; reference:＜40) | 0.8(0.44-1.45) | | 0.466 | |  | |  | |  | |
| ALT (U/L) (≥50; reference:＜50) | 0.78(0.46-1.33) | | 0.359 | |  | |  | |  | |
| Albumin (g/L) (≥40; reference:＜40) | 0.96(0.51-1.81) | | 0.908 | |  | |  | |  | |

*: significantly different

Table S4 Univariate and multivariate COX regression for total progression free survival in the whole population

| Total progression free survival | Univariate COX | | | | |  | | Multivariate COX | | |
| --- | --- | --- | --- | --- | --- | --- | --- | --- | --- | --- |
| HR (95% CI) | | | P-value | |  | | HR(95% CI) | P-value | |
| Age (years) ( ≥65; reference:＜65) | 0.72(0.39-1.33) | | | 0.296 | |  | |  |  | |
| ECOG PS score (1; reference: 0) | | 0.48(0.15-1.54) | 0.216 | |  | |  | | |  | |
| First-line treatment cycle ( ≥6; reference:＜6) | 0.44(0.26-0.72) | | | 0.001* | |  | | 0.44(0.26-0.72) | 0.001* | |
| Second-line treatment cycle ( ≥6; reference:＜6) | 0.99(0.6-1.62) | | | 0.965 | |  | |  |  | |
| BMI (kg/m2) (Normal weight; Overweight; reference: Underweight) | 1.35(0.81-2.23) | | | 0.248 | |  | |  |  | |
| Gender (Female; reference: Male) | 1.34(0.82-2.2) | | | 0.24 | |  | |  |  | |
| Biliary drainage (Yes; reference: No) | 1.35(0.66-2.73) | | | 0.408 | |  | |  |  | |
| Histological Grade (II; III; reference: I) | 0.74(0.46-1.18) | | | 0.205 | |  | |  |  | |
| Stage (IV; reference: III) | 0.84(0.45-1.58) | | | 0.593 | |  | |  |  | |
| Location (Other; Multicentric; reference: Head) | 1.05(0.77-1.42) | | | 0.76 | |  | |  |  | |
| Liver metastases (Yes; reference: No) | 0.75(0.46-1.24) | | | 0.268 | |  | |  |  | |
| Lung metastases (Yes; reference: No) | 0.66(0.28-1.53) | | | 0.333 | |  | |  |  | |
| Lymph node metastasis (Yes; reference: No) | 1.25(0.74-2.11) | | | 0.41 | |  | |  |  | |
| Peritoneal metastasis (Yes; reference: No) | 1.36(0.72-2.56) | | | 0.339 | |  | |  |  | |
| Other metastases (Yes; reference: No) | 0.7(0.4-1.22) | | | 0.206 | |  | |  |  | |
| pathological | 0.9(0.32-2.49) | | | 0.835 | |  | |  |  | |
| Diabetes (Yes; reference: No) | 0.8(0.47-1.36) | | | 0.405 | |  | |  |  | |
| Hepatitis B infection (Yes; reference: No) | 1.2(0.48-3.02) | | | 0.692 | |  | |  |  | |
| CA19-9 (U/mL) (≥35; reference:＜35) | 1.22(0.68-2.18) | | | 0.498 | |  | |  |  | |
| CA12-5 (U/mL) (≥35; reference:＜35) | 1.14(0.59-2.21) | | | 0.688 | |  | |  |  | |
| CA24-2 (U/mL) (≥20; reference:＜20) | 1(0.22-4.52) | | | 0.997 | |  | |  |  | |
| CA72-4 (U/mL) (≥5.3; reference:＜5.3) | 0.84(0.35-2.01) | | | 0.693 | |  | |  |  | |
| CEA (ng/mL) (≥5; reference:＜5) | 0.76(0.46-1.25) | | | 0.272 | |  | |  |  | |
| Scr (umol/L) (≥97; reference:＜97) | 0.87(0.4-1.92) | | | 0.737 | |  | |  |  | |
| TBIL (umol/L) (≥20.5; reference:＜20.5) | 0.71(0.44-1.14) | | | 0.157 | |  | |  |  | |
| DBIL (umol/L) (≥7; reference:＜7) | 1.15(0.62-2.12) | | | 0.654 | |  | |  |  | |
| IBIL (umol/L) (≥15; reference:＜15) | 0.66(0.33-1.35) | | | 0.254 | |  | |  |  | |
| AST (U/L) (≥40; reference:＜40) | 0.97(0.54-1.75) | | | 0.919 | |  | |  |  | |
| ALT (U/L) (≥50; reference:＜50) | 1.13(0.67-1.91) | | | 0.641 | |  | |  |  | |
| Albumin (g/L) (≥40; reference:＜40) | 1.17(0.62-2.22) | | | 0.62 | |  | |  |  | |

*: significantly different

**Figure legend**
